# Supplementary material for: Nanostructured Hybrids Based on Tantalum Bromide Octahedral Clusters and Graphene Oxide for Photocatalytic Hydrogen Evolution
Source: MDPI journal article supplement (doi:10.3390/nano12203647), 2022-10-18
Supplement: s1 [file s1]

# Supporting Information

## Nanostructured hybrids based on Tantalum Bromide Octahedral Clusters and Graphene Oxide for Photocatalytic Hydrogen Evolution

John Sebastián Hernández <sup>1</sup>, Maxim Shamshurin <sup>2</sup>, Marta Puche <sup>1</sup>, Maxim N. Sokolov <sup>2</sup>, and Marta Feliz <sup>1</sup>

<sup>1</sup>Instituto de Tecnología Química, Universitat Politècnica de València- Consejo Superior de Investigaciones Científicas (UPV-CSIC), Avd. de los Naranjos s/n, 46022 Valencia, Spain

<sup>2</sup>Nikolaev Institute of Inorganic Chemistry SB RAS, 3 Akad. Lavrentiev Ave., Novosibirsk, 630090, Russian Federation.

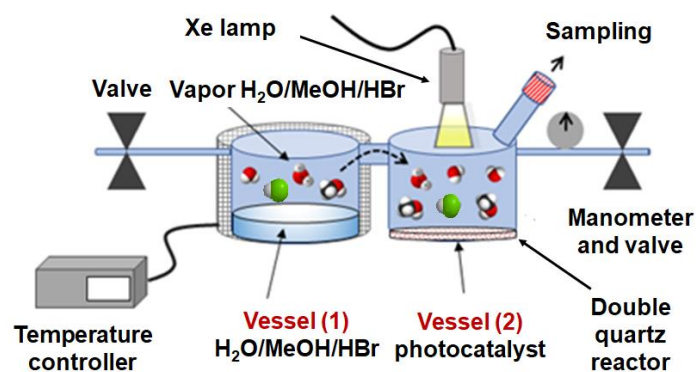

**Figure S1.** Experimental setup for photocatalytic hydrogen production in vapor phase conditions.

**Table S1.** Amount of H<sub>2</sub> produced in control tests done under standard photocatalytic conditions.

| Test | Control conditions                                         |       |      |     | H <sub>2</sub> produced (μmol) |
|------|------------------------------------------------------------|-------|------|-----|--------------------------------|
|      | Photocatalyst ({Ta <sub>6</sub> Br <sub>12</sub> )@GO-20L) | Light | MeOH | HBr |                                |
| 1    | No                                                         | Yes   | Yes  | Yes | 0.08                           |
| 2    | Yes                                                        | No    | Yes  | Yes | 0.08                           |
| 3    | Yes                                                        | Yes   | No   | Yes | 0.14                           |
| 4    | Yes                                                        | Yes   | Yes  | No  | 0.11                           |

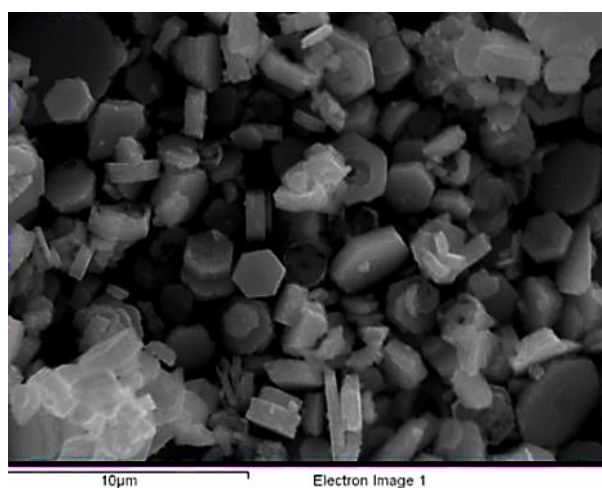

**Figure S2.** SEM image of  $[\text{Ta}_6\text{Br}_{12}]\text{Br}_2(\text{H}_2\text{O})_4 \cdot 4\text{H}_2\text{O}$ .

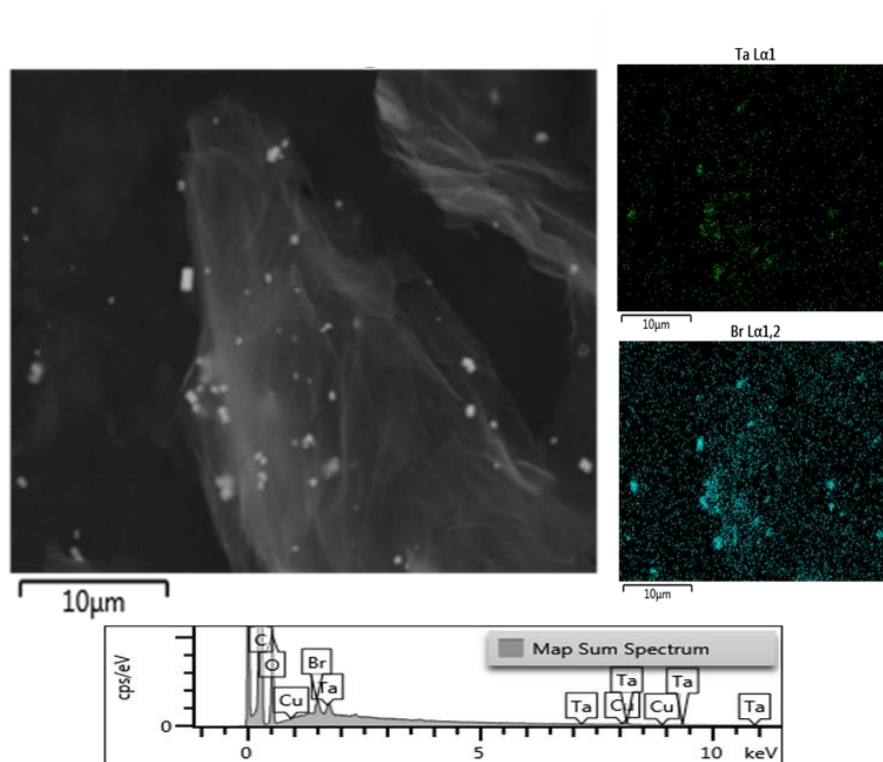

**Figure S3.** EDS analysis of {Ta<sub>6</sub>Br<sub>12</sub>}@GO-20L showing peaks of the mass percentage of bromine and tantalum. The Cu signal appear is not significant because the calculated concentration of this metal was below the quantification limit of the technique (< 0.05% w/w).

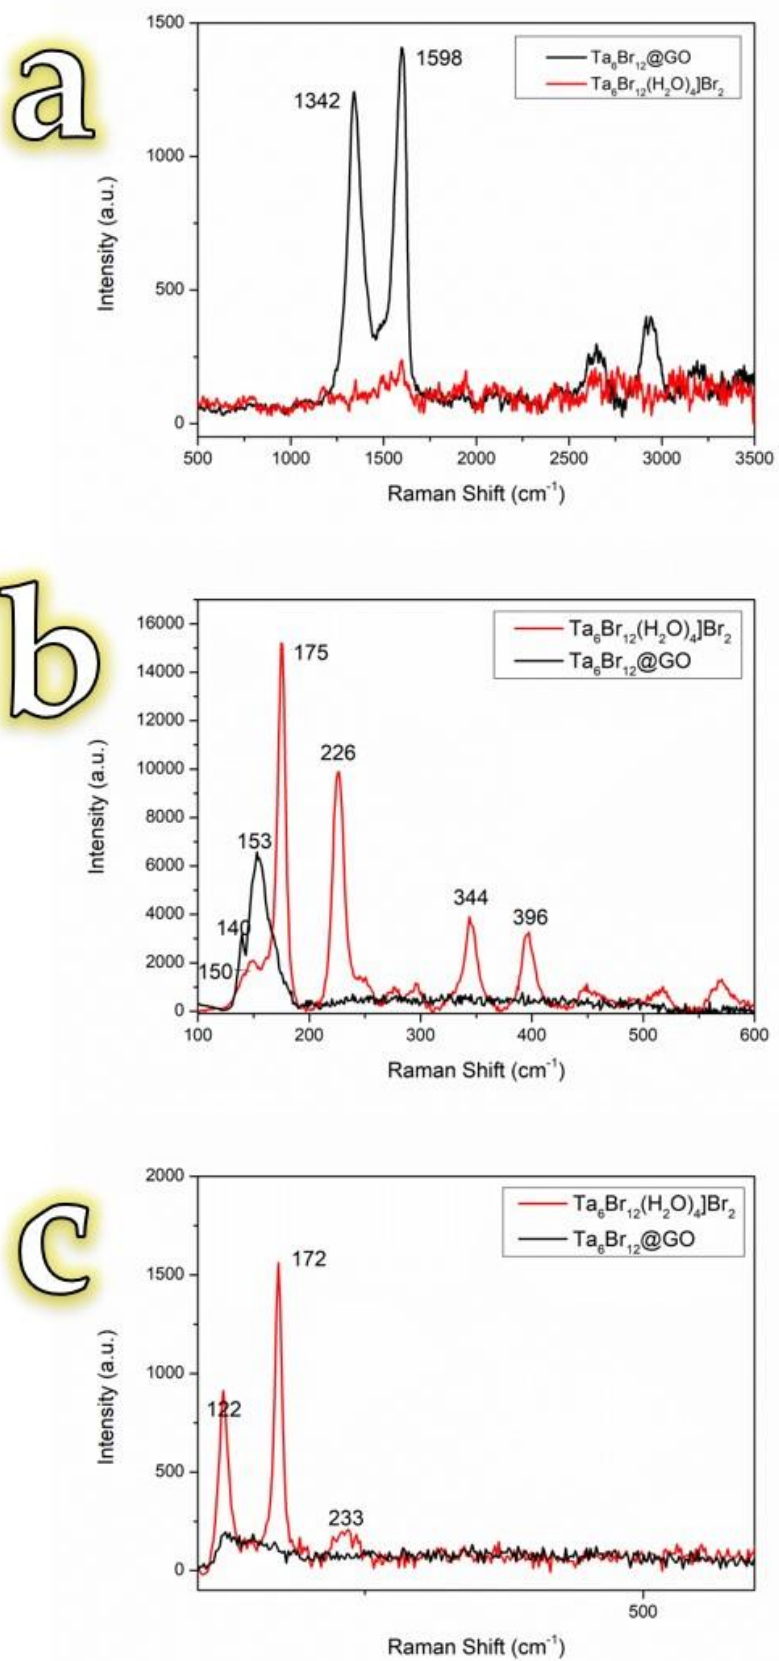

**Figure S4.** Raman spectra of  $\{\text{Ta}_6\text{Br}_{12}\}\text{@GO-20L}$  and  $[\{\text{Ta}_6\text{Br}_{12}\}\text{Br}_2(\text{H}_2\text{O})_4]\cdot 4\text{H}_2\text{O}$  materials recorded at 785 nm (a) and (b), and at 514 nm (c).

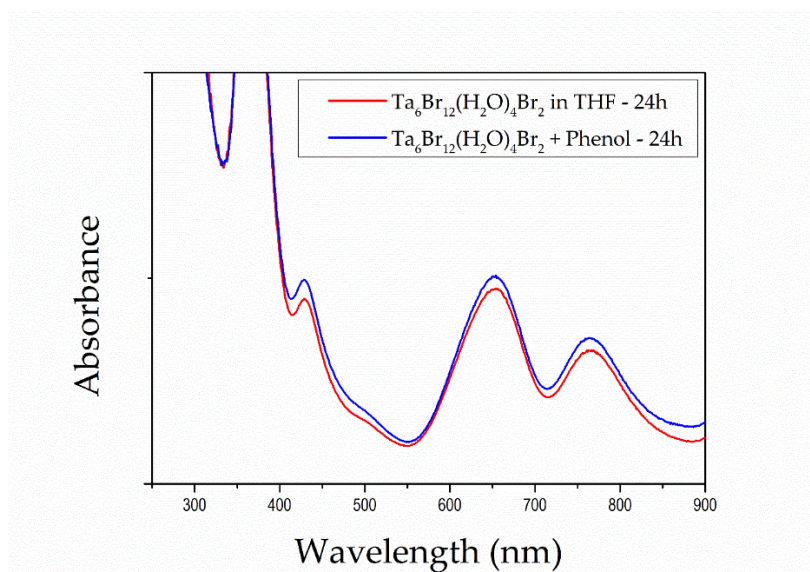

**Figure S5.** UV-Vis spectra of the (i) and (ii) solutions.

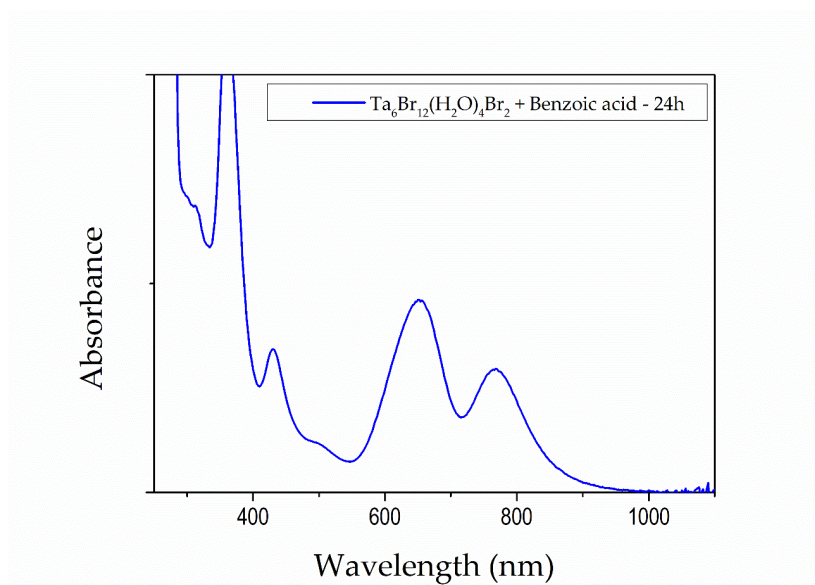

**Figure S6.** UV-Vis spectra of the (iii) solution.

**Table S2.** Optimal catalytic activities of {Ta<sub>6</sub>Br<sub>12</sub>}@GO-20L compared to octahedral molybdenum cluster-based photocatalysts and selected tantalum photocatalysts for H<sub>2</sub> production from water.<sup>a</sup>

| Photocatalyst                                                                                        | Sacrificial agent | Co-catalyst<br>/Photosensitizer  | Activity<br>(H <sub>2</sub> production,<br>μmol·g <sub>cat</sub> <sup>-1</sup> ·h <sup>-1</sup> ) | Ref.      |
|------------------------------------------------------------------------------------------------------|-------------------|----------------------------------|---------------------------------------------------------------------------------------------------|-----------|
| {Ta <sub>6</sub> Br <sub>12</sub> }@GO-20L                                                           | methanol          | None                             | 4 <sup>b</sup>                                                                                    | This work |
| (TBA) <sub>2</sub> Mo <sub>6</sub> I <sub>8</sub> @GO                                                | methanol          | None                             | 3 <sup>b</sup>                                                                                    | [12]      |
| (TBA) <sub>2</sub> [Mo <sub>6</sub> I <sub>8</sub> (O <sub>2</sub> CCH <sub>3</sub> ) <sub>6</sub> ] | methanol          | None                             | 7 <sup>b</sup>                                                                                    | [12]      |
| (TBA) <sub>2</sub> Mo <sub>6</sub> Br <sub>8</sub> @GO                                               | methanol          | None                             | 2 <sup>c</sup>                                                                                    | [35]      |
| LiTaO <sub>3</sub>                                                                                   | None              | None                             | 6 <sup>c</sup>                                                                                    | [36]      |
| NaTaO <sub>3</sub>                                                                                   | None              | None                             | 4 <sup>c</sup>                                                                                    | [36]      |
| MgTa <sub>2</sub> O <sub>6</sub>                                                                     | None              | None                             | 5 <sup>c</sup>                                                                                    | [36]      |
| BaTa <sub>2</sub> O <sub>6</sub> (Hexagonal phase)                                                   | None              | None                             | 7 <sup>c</sup>                                                                                    | [36]      |
| Ta <sub>2</sub> O <sub>5</sub>                                                                       | methanol          | H <sub>2</sub> PtCl <sub>6</sub> | 8 <sup>c</sup>                                                                                    | [58]      |
| Tantalum oxynitride                                                                                  | methanol          | Pt (3% wt)                       | 5 <sup>c</sup>                                                                                    | [65]      |
| Ta <sub>3</sub> N <sub>5</sub> nanoparticles                                                         | methanol          | Pt (3% wt)                       | 13 <sup>c</sup>                                                                                   | [66]      |
| Ta <sub>2</sub> O <sub>5</sub> @NRGO                                                                 | tetraethanolamine | None                             | 6500 <sup>c</sup>                                                                                 | [67]      |

<sup>a</sup> Abbreviations: NRGO = nitrogen-doped reduced graphene oxide; <sup>b</sup> Results obtained from aqueous mixtures in vapor phase; <sup>c</sup> Results obtained from aqueous mixtures in liquid phase;
